# Supplementary material for: Somatic mutations in 3929 HPV positive cervical cells associated with infection outcome and HPV type
Source: PubMed Central journal article supplement (PMC11393421; doi:10.1038/s41467-024-51713-y), 2024-09-12
Supplement: 41467_2024_51713_MOESM1_ESM.pdf [file 41467_2024_51713_MOESM1_ESM.pdf]

## Supplementary Information

### Title: Somatic mutations in 3929 HPV positive cervical cells associated with infection outcome and HPV type

Maisa Pinheiro<sup>1</sup>, Nicolas Wentzensen<sup>1</sup>, Michael Dean<sup>1,2</sup>, Meredith Yeager<sup>1,2,3</sup>, Zigui Chen<sup>4</sup>, Amulya Shastry<sup>1,2</sup>, Joseph F. Boland<sup>1,2</sup>, Sara Bass<sup>1,2</sup>, Laurie Burdett<sup>1,2</sup>, Thomas Lorey<sup>5</sup>, Sambit Mishra<sup>1,2</sup>, Philip E. Castle<sup>1,6</sup>, Mark Schiffman<sup>1</sup>, Robert D. Burk<sup>7,8</sup>, Bin Zhu<sup>1</sup>, Lisa Mirabello<sup>1\*</sup>

## Supplementary Methods

### Mutation calling quality control

Amplicon panel sequence reads were mapped to hg19 using Torrent Mapping Alignment Program (TMAP; Thermo Fisher Scientific) with the following options: max-adapter-bases-for-soft-clipping = 25; end-repair = 15; min-al-len = 50. Only reads with a mapping quality of  $\geq 4$  were considered for variant calling. TVC v.5.0.3 (Thermo Fisher Scientific) was used for variant calling with the following parameters: snp\_min\_coverage = 100; snp\_min\_cov\_each\_strand = 4; snp\_min\_variant\_score = 6; snp\_min\_allele\_freq = 0.02; snp\_strand\_bias = 0.95; snp\_strand\_bias\_pval = 0.01.

We used Acrometrix Oncology Hotspot Control DNA (AOH) to optimize the quality control filters for low variant allele fraction (VAF) mutations called by our targeted sequencing panel. This control panel consists of a mixture of genomic DNA, derived from the cell line DM24385 used to develop the Genome in a Bottle reference genome<sup>1</sup>, and synthetic DNA, with known somatic mutations in cancers introduced at variant low allelic fractions. The AOH controls harbored 148 known mutations in eight of our 19 genes of interest (*TP53*, *STK11*, *PTEN*, *PIK3CA*, *KRAS*, *HRAS*, *FBXW7*, *ERBB2*), including 26 genomic variants (equivalent to germline variants), 37 variants with a target AF of 15-35% and 105 with a target AF of 5-15%. We sequenced this same control in triplicate, here called AOH-T1, AOH-T2 and AOH-T3, as part of 3 different experimental plates. We evaluated the expected and observed mutation VAFs and six additional VCF parameters generated by Torrent Variant Caller (TVC) related to variant quality and coverage including FILTER (passed TVC low-VAF parameters), QUAL (quality), FDP (flow evaluator read depth at the locus or total number of reads at the locus), FAO (flow

evaluator alternate allele observations or number of reads with alternate allele), STB (strand bias in variant relative to reference) and MLLD (mean log-likelihood delta per read). The threshold for each parameter was: FILTER = PASS, QUAL $\geq$ 10, FDP $\geq$ 100, FAO $\geq$ 6, STB $<$ 0.9, MLLD $>$ 55. Out of 148 target mutations (137 SNVs, 3 insertions and 8 deletions), TVC called a total of 126 (85.1%) mutations with low-AF parameters, including 120 SNVs (88%), 2 insertions (50%) and 4 deletions (50%). For each independent replicate, 121 mutations were called in sample AOH-T1, 122 called in sample AOH-T2 and 122 called in sample AOH-T3. For samples AOH-T1, AOH-T2 and AOH-T3, respectively, 93.4%, 91.1% and 95.1% of mutations called with the low-AF parameters had concordant target and observed AF, while 8, 11 and 6 mutations were called below the target AF 5-15% (Figure S1).

### **HS mutation classification**

First, for the CGI webtool we used the options “cancer type = cervix” and “reference genome = hg19”. For Mutagene, we downloaded mutation annotation databases separately by each gene, using the “analyze gene tab”, then selected the options “Cancer type = cervical squamous cell carcinoma” and “observed mutations = mutations in the selected cancer cohort” for mutations important for ICC, then selected the options “cancer type = Pan-Cancer” and “observed mutations = all genome wide studies in ICGC” for mutations important for other cancer types. For cBioPortal-TCGA-cervix, we downloaded the full cervical cancer mutation database and calculated the frequency of somatic mutation in that database by unique amino-acid (aa) change and by multiple mutations at the same aa position. For CHASMplus, we also downloaded the full database and focused on “common” mutations in “Pan-Cancer”.

### **HPV genome sequencing and lineage/sublineage assignment**

DNA from each woman in the study also had type-specific HPV16, HPV18, and/or HPV45 whole-genome sequencing<sup>2-4</sup>. DNA underwent library construction according to the manufacturer’s recommendations using AmpliSeq Library Preparation kit 2.0-96LV (Thermo Fisher Scientific) and custom oligonucleotide primers, designed by Life Tech in conjunction with our lab personnel, that amplify 46-48 amplicons covering 100% of the viral genomes. Amplification was performed using Phusion High-Fidelity DNA (Thermo Fisher Scientific), with an error rate less than 1%. Individual libraries were quantified prior to sequencing using the

Kapa Biosystems Library Quantification Kit - IonTorrent/LightCycler480, and library concentration was determined using Agilent BioAnalyzer DNA High-Sensitivity LabChip (Agilent Technologies). Sequencing was performed on the Thermo Fisher Life Science Ion Torrent S5 GeneStudio systems (Thermo Fisher Scientific). Raw sequence reads were quality assessed and trimmed, and then mapped to the HPV16, HPV18, or HPV45 reference complete genome sequences using Ion Torrent Suite software (Life Technologies, Thermo Fisher Scientific). An in-house custom pipeline was used for variant calling and gene annotation using the Torrent Variant Caller v.5.0.3 and snpEff v.3.6c.

Each HPV sequence was assigned to an HPV type-specific lineage/sublineage based on the maximum likelihood phylogenetic tree topology constructed with RAxML MPI<sup>5</sup> and type-specific HPV16, HPV18 and HPV45 genome sequence FASTA files, including known lineage/sublineage reference sequences for that HPV type<sup>3,4,6</sup>. Each tree was bootstrapped 1,000 times, and sublineage assignments were assigned by proximity in the tree to known sublineage reference sequences. Each HPV16 sequence was classified as one of the following sublineages A1-A4, B, C, or D1-D4; HPV18 sequences were classified as sublineage A1-A5, or B; and, HPV45 sequences as sublineage A1, A2, B1, B2, or C1.

## References

- 1 Zook, J. M. *et al.* Extensive sequencing of seven human genomes to characterize benchmark reference materials. *Sci Data* **3**, 160025 (2016).  
<https://doi.org/10.1038/sdata.2016.25>
- 2 Cullen, M. *et al.* Deep sequencing of HPV16 genomes: A new high-throughput tool for exploring the carcinogenicity and natural history of HPV16 infection. *Papillomavirus research* **1**, 3-11 (2015). <https://doi.org/10.1016/j.pvr.2015.05.004>
- 3 Pinheiro, M. *et al.* Phylogenomic Analysis of Human Papillomavirus Type 31 and Cervical Carcinogenesis: A Study of 2093 Viral Genomes. *Viruses* **13** (2021).  
<https://doi.org/10.3390/v13101948>
- 4 Pinheiro, M. *et al.* Association of HPV35 with cervical carcinogenesis among women of African ancestry: Evidence of viral-host interaction with implications for disease intervention. *Int J Cancer* **147**, 2677-2686 (2020). <https://doi.org/10.1002/ijc.33033>
- 5 Stamatakis, A. RAxML-VI-HPC: maximum likelihood-based phylogenetic analyses with thousands of taxa and mixed models. *Bioinformatics* **22**, 2688-2690 (2006).  
<https://doi.org/10.1093/bioinformatics/btl446>
- 6 Mirabello, L. *et al.* HPV16 Sublineage Associations With Histology-Specific Cancer Risk Using HPV Whole-Genome Sequences in 3200 Women. *JNCI: Journal of the National Cancer Institute* **108**, djw100-djw100 (2016).  
<https://doi.org/10.1093/jnci/djw100>

## Supplementary Figures

**Supplementary Figure 1.** Target versus observed variant allele fraction (AF) of 137 known mutations called by the Torrent Variant Caller (TVC).

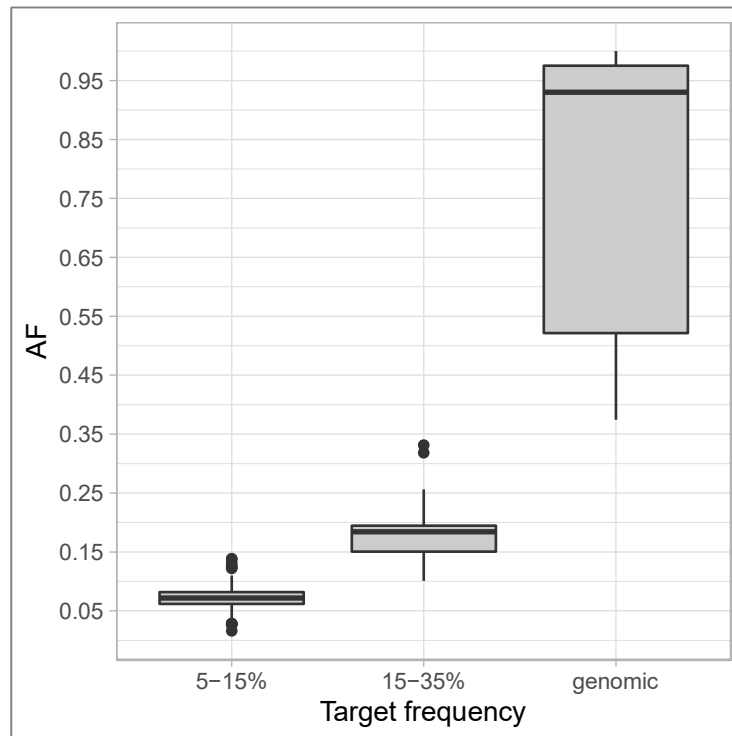

**Supplementary Figure 2.** Overall variant allele fraction (AF) of all mutations by TIER classification.

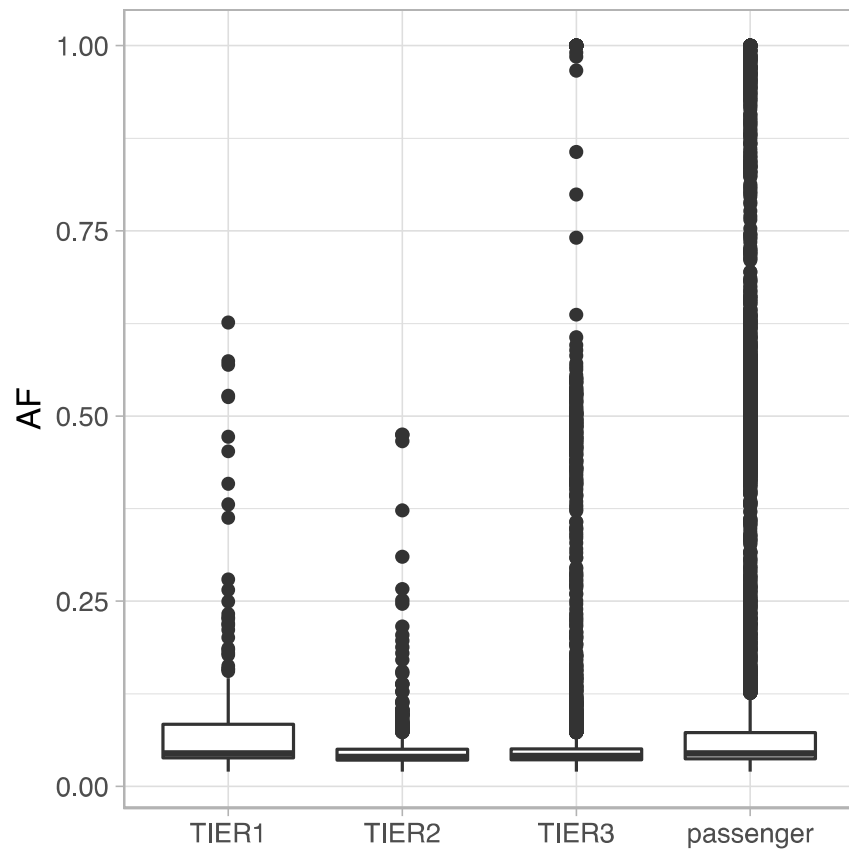

|            |       |       |       |       |
|------------|-------|-------|-------|-------|
| Mean VAF   | 0.093 | 0.049 | 0.063 | 0.126 |
| Median VAF | 0.045 | 0.040 | 0.041 | 0.045 |

**Supplementary Figure 3.** Odds ratios calculated using a generalized linear mixed-effects model for the association of hotspot mutations and the probability of being cancers instead of controls with HPV type lineages/sublineages as the random effect. The bars represent 95% confidence intervals (CIs) for the corresponding odds ratio estimates for each HPV lineage/sublineage. The horizontal red line represents the average odds ratio estimates across HPV lineages/sublineages.

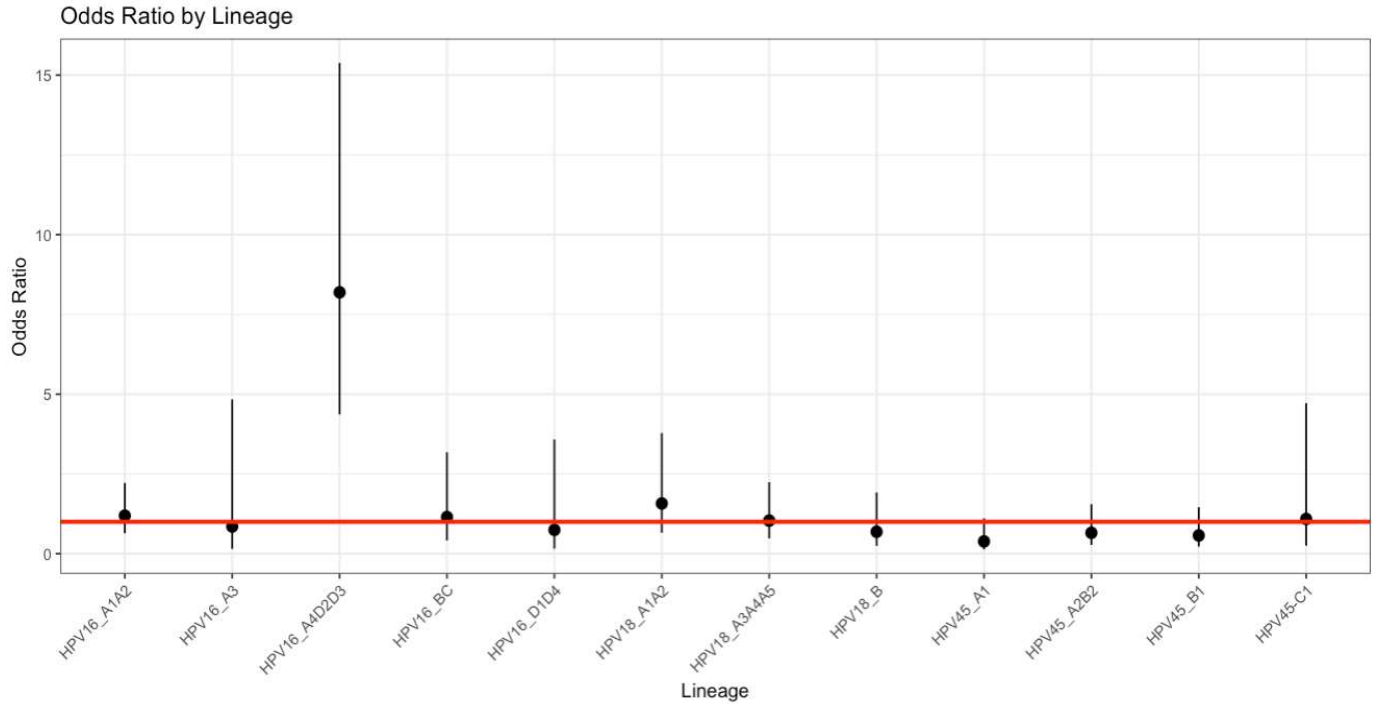

|                |             | HPV16 A1A2 |       | HPV16 A3 |        | HPV16 A4D2D3 |       | HPV16 BC |       | HPV16 D1D4 |        | HPV18 A1A2 |       | HPV18 A3A4A5 |       | HPV18 B |       | HPV45 A1 |       | HPV45 A2B2 |       | HPV45 B1 |       | HPV45 C1 |       |
|----------------|-------------|------------|-------|----------|--------|--------------|-------|----------|-------|------------|--------|------------|-------|--------------|-------|---------|-------|----------|-------|------------|-------|----------|-------|----------|-------|
|                |             | N          | %     | N        | %      | N            | %     | N        | %     | N          | %      | N          | %     | N            | %     | N       | %     | N        | %     | N          | %     | N        | %     | N        | %     |
| <b>CONTROL</b> | No HS       | 398*       | 86.3% | 3        | 100.0% | 43           | 55.1% | 38       | 84.4% | 6          | 100.0% | 63         | 86.3% | 135          | 88.2% | 58      | 93.5% | 84       | 95.5% | 90         | 91.8% | 77       | 93.9% | 10       | 90.9% |
|                | ≥1 TIER1 HS | 14         | 3.0%  | 0        | 0.0%   | 0            | 0.0%  | 2        | 4.4%  | 0          | 0.0%   | 1          | 1.4%  | 4            | 2.6%  | 1       | 1.6%  | 2        | 2.3%  | 3          | 3.1%  | 2        | 2.4%  | 0        | 0.0%  |
| <b>CANCER</b>  | No HS       | 34         | 7.4%  | 0        | 0.0%   | 27           | 34.6% | 4        | 8.9%  | 0          | 0.0%   | 8          | 11.0% | 9            | 5.9%  | 3       | 4.8%  | 1        | 1.1%  | 4          | 4.1%  | 3        | 3.7%  | 1        | 9.1%  |
|                | ≥1 TIER1 HS | 15         | 3.3%  | 0        | 0.0%   | 8            | 10.3% | 1        | 2.2%  | 0          | 0.0%   | 1          | 1.4%  | 5            | 3.3%  | 0       | 0.0%  | 1        | 1.1%  | 1          | 1.0%  | 0        | 0.0%  | 0        | 0.0%  |

\* Reference group. % = column percentage.

**Supplementary Figure 4.** Variant allele fraction (AF) of hotspot mutations by **a**) status in the single time-point analyses for TIER2 mutations, and by **b**) serial time-point analyses in non-cancer samples. P values were estimated using a two-sided Wilcoxon rank sum test with continuity correction. ns= not significant; \* p value  $\leq 0.05$ ; \*\*\* p value  $\leq 0.001$ .

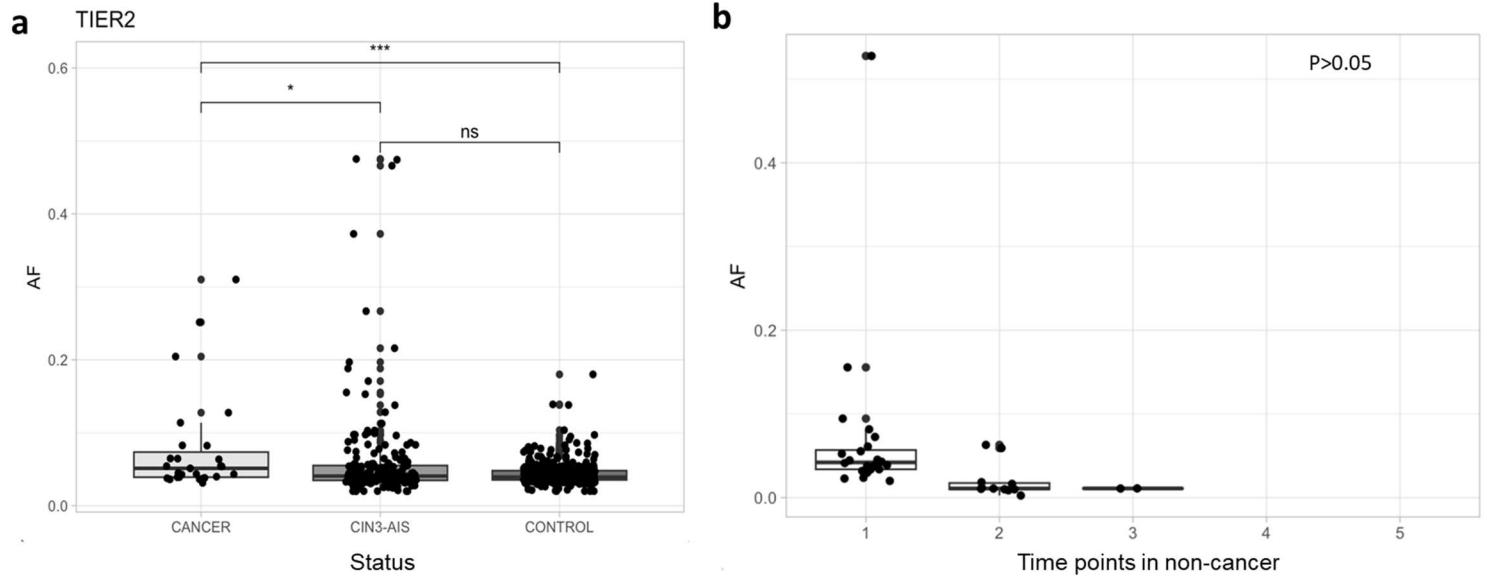



**Supplementary Figure 5.** Variant allele fraction (AF) of individual hotspot mutations and the AF change in multiple serial time-points. Red dashed lines = AF threshold of 0.02. Colored lines represent a woman, and dots represent samples with mutations collected from the same woman.

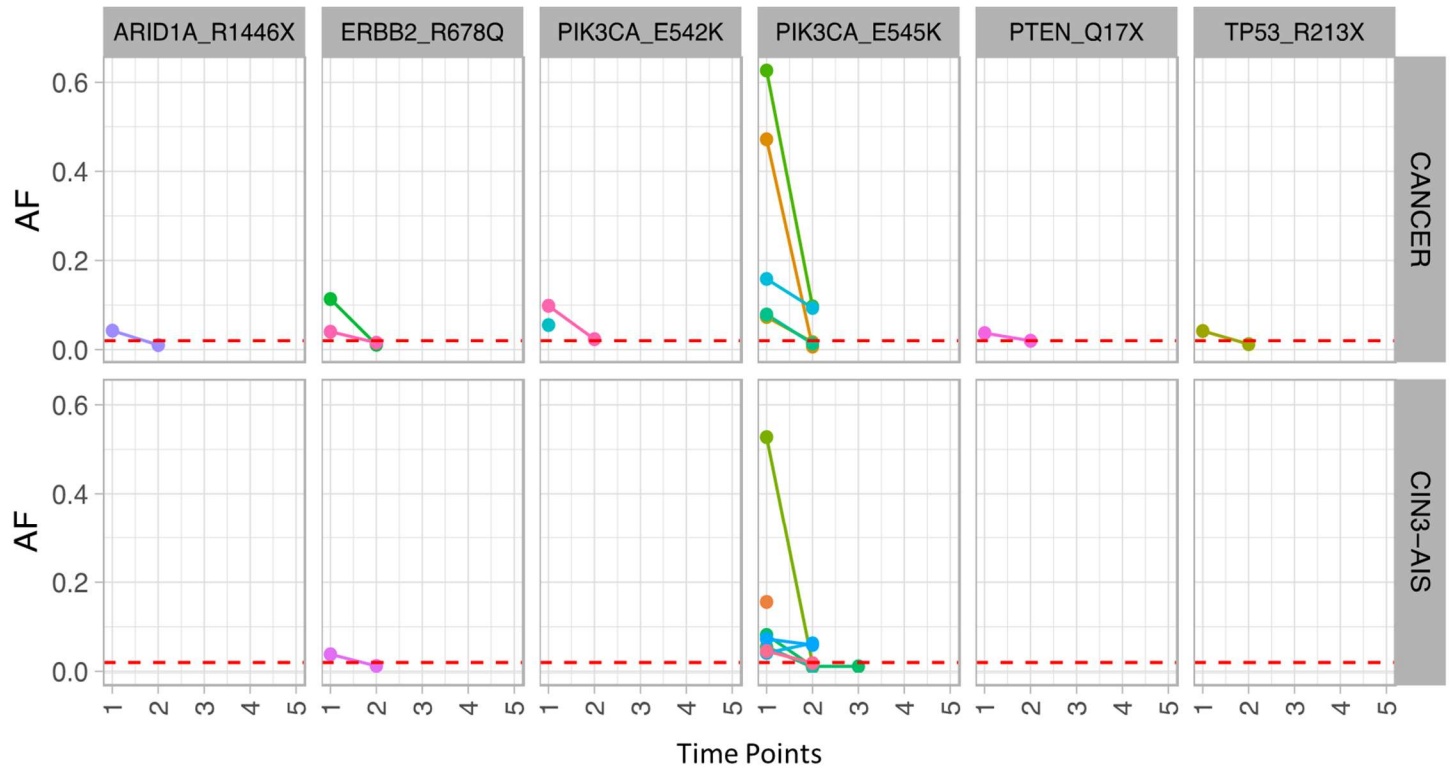

## Supplementary Tables

**Supplementary Table 1:** Samples counts used in the “single time-point” analyses (N=3,351) by years from outcome ascertainment.

| Status        | Total women | Total samples                  |                                           |
|---------------|-------------|--------------------------------|-------------------------------------------|
|               | N           | ≤2y from outcome ascertainment | ≥3y (max year) from outcome ascertainment |
| ADC           | 76          | 70                             | 6 (5)                                     |
| SCC           | 74          | 63                             | 11 (7)                                    |
| ICC unk.      | 11          | 11                             | 0                                         |
| AIS           | 166         | 157                            | 9 (7)                                     |
| CIN3          | 984         | 909                            | 75 (10)                                   |
| AIS/CIN3 unk. | 1           | 1                              | 0                                         |
| CIN2          | 561         | 520                            | 41 (9)                                    |
| Control       | 1478        | 1300                           | 178 (11)                                  |
| <b>Total</b>  | <b>3351</b> | <b>3031</b>                    | <b>320</b>                                |

ADC = adenocarcinoma; SCC = squamous cell carcinoma; ICC = invasive cervical cancer; AIS = adenocarcinoma in situ; CIN3 = cervical intraepithelial neoplasia grade 3; CIN2 = CIN grade 2; unk = unknown histology. Controls include women with normal cytology/histology and low-grade lesions (ASCUS, LSIL, CIN1).

**Supplementary Table 2:** Number of women with a single HPV16, HPV18, or HPV45 infection and number with HR-HPV co-infections.

| <b>Status</b> | HPV16<br>single | HPV18<br>single | HPV45<br>single | HPV16,<br>18 | HPV16,<br>45 | HPV16,<br>18, 45 | HPV18,<br>45 | HPV16,<br>other <sup>†</sup><br>HR-HPV | HPV18,<br>other <sup>†</sup><br>HR-HPV | HPV45,<br>other <sup>†</sup><br>HR-HPV | Total<br>women |
|---------------|-----------------|-----------------|-----------------|--------------|--------------|------------------|--------------|----------------------------------------|----------------------------------------|----------------------------------------|----------------|
| ADC           | 43              | 21              | 8               |              |              |                  |              | 2                                      | 2                                      |                                        | 76             |
| SCC           | 51              | 8               | 4               | 1            | 2            |                  |              | 8                                      |                                        |                                        | 74             |
| ICC unk.      | 10              | 1               |                 |              |              |                  |              |                                        |                                        |                                        | 11             |
| AIS           | 74              | 40              | 5               | 10           | 1            | 2                | 3            | 21                                     | 8                                      | 2                                      | 166            |
| CIN3          | 612             | 49              | 27              | 35           | 20           | 3                | 4            | 193                                    | 28                                     | 13                                     | 984            |
| AIS/CIN3 unk. |                 | 1               |                 |              |              |                  |              |                                        |                                        |                                        | 1              |
| CIN2          | 159             | 90              | 51              | 41           | 28           | 2                | 10           | 104                                    | 46                                     | 30                                     | 561            |
| Control       | 496             | 223             | 232             | 49           | 33           | 2                | 4            | 281                                    | 80                                     | 78                                     | 1478           |
| <b>total</b>  | <b>1445</b>     | <b>433</b>      | <b>327</b>      | <b>136</b>   | <b>84</b>    | <b>9</b>         | <b>21</b>    | <b>609</b>                             | <b>164</b>                             | <b>123</b>                             | <b>3351</b>    |

ADC = adenocarcinoma; SCC = squamous cell carcinoma; ICC = invasive cervical cancer; AIS = adenocarcinoma in situ; CIN3 = cervical intraepithelial neoplasia grade 3; CIN2 = CIN grade 2; unk = unknown histology; <sup>†</sup> other HR-HPV indicates a co-infection with a HR-HPV type other than HPV16, HPV18 or HPV45.

**Supplementary Table 3:** Sample counts used in the “serial time-point” analyses (N=974) by order of collection and years from outcome ascertainment.

| Total women                   |            | Total samples, most recent collection* |                | Total samples, prior collections |                |           |                |          |                |                |
|-------------------------------|------------|----------------------------------------|----------------|----------------------------------|----------------|-----------|----------------|----------|----------------|----------------|
| Time points (TP) <sup>†</sup> |            | TP1                                    |                | TP2                              |                | TP3       |                | TP4      |                | TP5            |
| Status                        | N          | ≤2y                                    | ≥3y (max year) | ≤2y                              | ≥3y (max year) | ≤2y       | ≥3y (max year) | ≤2y      | ≥3y (max year) | ≥3y (max year) |
| Cancer                        | 43         | 37                                     | 6 (8)          | 25                               | 18 (9)         | 1         | 9 (8)          | 0        | 5 (9)          | 2 (10)         |
| CIN3/AIS                      | 216        | 200                                    | 16 (8)         | 138                              | 78 (8)         | 11        | 78 (8)         | 0        | 33 (9)         | 3 (5)          |
| CIN2                          | 62         | 57                                     | 5 (7)          | 43                               | 19 (9)         | 4         | 7 (5)          | 0        | 3 (5)          | 0 (-)          |
| Control                       | 75         | 59                                     | 16 (10)        | 63                               | 12 (11)        | 10        | 10 (4)         | 3        | 2 (4)          | 1 (7)          |
| <b>Total</b>                  | <b>396</b> | <b>353</b>                             | <b>43</b>      | <b>269</b>                       | <b>127</b>     | <b>26</b> | <b>104</b>     | <b>3</b> | <b>43</b>      | <b>6</b>       |

\*also used in the cross-sectional analyses. <sup>†</sup> time-points are categorized based on the delta values between the sequential time-points and categorized based on this time-frame as ≤2years or ≥3years from diagnosis or the preceding serial sample. CIN3 = cervical intraepithelial neoplasia grade 3; AIS = adenocarcinoma in situ; CIN2 = CIN grade 2.

**Supplementary Table 4:** Variant allele fraction (VAF) of known target mutations called in the Acrometrix Oncology Hotspot (AOH) control samples using our panel sequencing assay.

| <b>Control ID</b> | <b>VAF range</b> | <b>Total mutations called</b> | <b>N, mutations kept after filters</b> | <b>% of mutations kept after filters</b> |
|-------------------|------------------|-------------------------------|----------------------------------------|------------------------------------------|
| AOH-T1            | (0.02,0.05]      | 8                             | 6                                      | 75.00%                                   |
|                   | (0.05,0.15]      | 87                            | 86                                     | 98.90%                                   |
|                   | (0.15,0.35]      | 21                            | 18                                     | 85.70%                                   |
|                   | (0.35,1]         | 5                             | 5                                      | 100.00%                                  |
|                   | <b>Total</b>     | 121                           | 115                                    | 77.70%                                   |
| AOH-T2            | (0.02,0.05]      | 10                            | 7                                      | 70.00%                                   |
|                   | (0.05,0.15]      | 86                            | 84                                     | 97.70%                                   |
|                   | (0.15,0.35]      | 20                            | 18                                     | 90.00%                                   |
|                   | (0.35,1]         | 6                             | 6                                      | 100.00%                                  |
|                   | <b>Total</b>     | 122                           | 115                                    | 77.70%                                   |
| AOH-T3            | (0.02,0.05]      | 6                             | 5                                      | 83.30%                                   |
|                   | (0.05,0.15]      | 93                            | 91                                     | 97.80%                                   |
|                   | (0.15,0.35]      | 17                            | 15                                     | 88.20%                                   |
|                   | (0.35,1]         | 6                             | 6                                      | 100.00%                                  |
|                   | <b>Total</b>     | 122                           | 117                                    | 79.10%                                   |

**Supplementary Table 5:** Association of TIER2 hotspot mutations with precancers and cancers among samples collected within 2 years of outcome ascertainment.

| Status   | Total | no HS mutation |        | ≥1 HS mutations       |       | P                          | OR   | 95%CI |      |
|----------|-------|----------------|--------|-----------------------|-------|----------------------------|------|-------|------|
|          |       | N              | %      | N                     | %     |                            |      |       |      |
| Control  | 1300  | 1114           | 85.7%  | 186                   | 14.3% | <i>ref</i>                 |      |       |      |
| CIN2     | 520   | 461            | 88.7%  | 59                    | 11.3% | 0.10                       | 0.77 | 0.56  | 1.05 |
| CIN3/AIS | 1067  | 952            | 89.2%  | 115                   | 10.8% | <b>0.01</b>                | 0.72 | 0.56  | 0.93 |
| CIN3     | 909   | 820            | 90.2%  | 89                    | 9.8%  | <b>1.7x10<sup>-3</sup></b> | 0.65 | 0.50  | 0.85 |
| AIS      | 157   | 131            | 83.4%  | 26                    | 16.6% | 0.45                       | 1.19 | 0.76  | 1.86 |
| Cancer   | 144   | 122            | 84.7%  | 22                    | 15.3% | 0.75                       | 1.08 | 0.67  | 1.75 |
| SCC      | 63    | 57             | 90.5%  | 6                     | 9.5%  | 0.29                       | 0.63 | 0.27  | 1.48 |
| ADC      | 70    | 57             | 81.4%  | 13                    | 18.6% | 0.33                       | 1.37 | 0.73  | 2.54 |
|          |       | N              | %      | N, <i>PIK3CA</i>      | %     |                            |      |       |      |
| Control  | 1118  | 1114           | 99.6%  | 4                     | 0.4%  | <i>ref</i>                 |      |       |      |
| Cancer   | 122   | 122            | 100.0% | 0                     | 0.0%  | 0.765                      | -    | -     | -    |
|          |       | N              | %      | N, non- <i>PIK3CA</i> | %     |                            |      |       |      |
| Control  | 1285  | 1114           | 86.7%  | 171                   | 13.3% | <i>ref</i>                 |      |       |      |
| Cancer   | 142   | 122            | 85.9%  | 20                    | 14.1% | 0.79                       | 1.07 | 0.65  | 1.76 |
| SCC      | 63    | 57             | 90.5%  | 6                     | 9.5%  | 0.39                       | 0.69 | 0.29  | 1.61 |
| ADC      | 68    | 57             | 83.8%  | 11                    | 16.2% | 0.50                       | 1.26 | 0.65  | 2.45 |

CIN2 = cervical intraepithelial neoplasia grade 2; CIN3 = CIN grade 3, AIS = adenocarcinoma in situ; SCC = squamous cell carcinoma, ADC = adenocarcinoma; HS = hotspot; P = P value by multinomial logistic regression; OR = odds ratio; CI = confidence interval. OR, 95%CI, and P values were estimated using multinomial logistic regression; tests were two-sided. Significant P values are bolded.

**Supplementary Table 6:** Distribution of hotspot mutations identified in cancers compared with their prevalence in controls.

| TIER  | Status  | Total | No HS mutation |       | ≥1 HS mutations |       | P                                |
|-------|---------|-------|----------------|-------|-----------------|-------|----------------------------------|
|       |         |       | N              | %     | N               | %     |                                  |
| TIER1 | Control | 1300  | 1277           | 98.2% | 23              | 1.8%  | <b>&lt;2.2 x10<sup>-16</sup></b> |
|       | Cancer  | 144   | 107            | 74.3% | 37              | 25.7% |                                  |
| TIER2 | Control | 1300  | 1248           | 96.0% | 52              | 4.0%  | <b>8.2 x10<sup>-7</sup></b>      |
|       | Cancer  | 144   | 122            | 84.7% | 22              | 15.3% |                                  |

HS = hotspot. P values estimated with two-sided Fisher's exact tests. Significant P values are bolded.

**Supplementary Table 7:** Associations of hotspot mutations matching APOBEC3 and non-APOBEC3 motifs for TIER1 and by HPV type.

| HPV      | Status  | Total | No HS mutation |       | ≥1 HS mutations |       | P                          | OR   | 95%CI          |       |
|----------|---------|-------|----------------|-------|-----------------|-------|----------------------------|------|----------------|-------|
|          |         |       | N              | %     | N, APOBEC3      | %     |                            |      | N, non-APOBEC3 | %     |
| HPV16    | Control | 648   | 645            | 99.5% | 3               | 0.5%  | <i>ref</i>                 |      |                |       |
|          | Cancer  | 92    | 75             | 81.5% | 17              | 18.5% | <b>1.1x10<sup>-9</sup></b> | 48.7 | 14.0           | 170.2 |
|          | Control | 659   | 645            | 97.9% | 14              | 2.1%  | <i>ref</i>                 |      |                |       |
|          | Cancer  | 84    | 75             | 89.3% | 9               | 10.7% | <b>1.2x10<sup>-4</sup></b> | 5.5  | 2.3            | 13.2  |
| HPV18/45 | Control | 548   | 543            | 99.1% | 5               | 0.9%  | <i>ref</i>                 |      |                |       |
|          | Cancer  | 34    | 30             | 88.2% | 4               | 11.8% | <b>1.2x10<sup>-4</sup></b> | 14.5 | 3.7            | 56.7  |
|          | Control | 552   | 543            | 98.4% | 9               | 1.6%  | <i>ref</i>                 |      |                |       |
|          | Cancer  | 34    | 30             | 88.2% | 4               | 11.8% | <b>9.3x10<sup>-4</sup></b> | 8.0  | 2.3            | 27.6  |

Samples with co-occurrence of both APOBEC3 and non-APOBEC3 induced mutations were excluded from the analyses. P = logistic regression; HS = hotspot; OR = odds ratio; CI = confidence interval. Significant P values are bolded. OR, 95%CI, and P values were estimated using logistic regression; tests were two-sided



**Supplementary Table 8:** Association of hotspot mutations with precancers and cancers among samples collected  $\geq 3$  years from outcome ascertainment.

| TIER  | Status   | Total | no HS mutation |        | $\geq 1$ HS mutations |       | P           | OR   | 95%CI |       |
|-------|----------|-------|----------------|--------|-----------------------|-------|-------------|------|-------|-------|
|       |          |       | N              | %      | N                     | %     |             |      |       |       |
| TIER1 | Control  | 178   | 173            | 97.2%  | 5                     | 2.8%  |             |      |       |       |
|       | CIN2     | 41    | 41             | 100.0% | 0                     | 0.0%  | 0.93        | -    | -     | -     |
|       | CIN3/AIS | 84    | 81             | 96.4%  | 3                     | 3.6%  | 0.74        | 1.28 | 0.30  | 5.49  |
|       | CIN3     | 75    | 73             | 97.3%  | 2                     | 2.7%  | 0.95        | 0.95 | 0.18  | 5.00  |
|       | AIS      | 9     | 8              | 88.9%  | 1                     | 11.1% | 0.20        | 4.33 | 0.45  | 41.47 |
|       | Cancer   | 17    | 15             | 88.2%  | 2                     | 11.8% | 0.08        | 4.61 | 0.82  | 25.82 |
|       | SCC      | 11    | 9              | 81.8%  | 2                     | 18.2% | <b>0.02</b> | 7.68 | 1.31  | 45.17 |
|       | ADC      | 6     | 6              | 100.0% | 0                     | 0.0%  | 0.91        | -    | -     | -     |
| TIER2 | Control  | 178   | 163            | 91.6%  | 15                    | 8.4%  |             |      |       |       |
|       | CIN2     | 41    | 37             | 90.2%  | 4                     | 9.8%  | 0.79        | 1.17 | 0.37  | 3.74  |
|       | CIN3/AIS | 84    | 76             | 90.5%  | 8                     | 9.5%  | 0.77        | 1.14 | 0.47  | 2.81  |
|       | CIN3     | 75    | 68             | 90.7%  | 7                     | 9.3%  | 0.82        | 1.12 | 0.44  | 2.87  |
|       | AIS      | 9     | 8              | 88.9%  | 1                     | 11.1% | 0.78        | 1.36 | 0.16  | 11.61 |
|       | Cancer   | 17    | 14             | 82.4%  | 3                     | 17.6% | 0.22        | 2.33 | 0.60  | 9.02  |
|       | SCC      | 11    | 10             | 90.9%  | 1                     | 9.1%  | 0.94        | 1.09 | 0.13  | 9.08  |
|       | ADC      | 6     | 4              | 66.7%  | 2                     | 33.3% | 0.06        | 5.43 | 0.92  | 32.15 |

HS = hotspot; OR = odds ratio; CI = confidence interval; P=multinomial logistic regression. Significant P values are bolded. OR, 95%CI, and P values were estimated using multinomial logistic regression; tests were two-sided.

**Supplementary Table 9:** Samples included in time-point 1 (TP1) with hotspot mutations.

| Status       | All samples with $\geq 1$ TIER1/2 HS mutations |    |       | $\leq 2$ years samples with $\geq 1$ TIER1/2 HS mutations |    |       | $\geq 3$ years samples with $\geq 1$ TIER1/2 HS mutations |   |       |
|--------------|------------------------------------------------|----|-------|-----------------------------------------------------------|----|-------|-----------------------------------------------------------|---|-------|
|              | Total                                          |    |       | Total                                                     |    |       | Total                                                     |   |       |
|              | N                                              | N  | %     | N                                                         | N  | %     | N                                                         | N | %     |
| Cancer       | 43                                             | 15 | 34.9% | 37                                                        | 13 | 35.1% | 6                                                         | 2 | 33.3% |
| CIN3/AIS     | 216                                            | 15 | 6.9%  | 200                                                       | 15 | 7.5%  | 16                                                        | 0 | 0.0%  |
| CIN2         | 62                                             | 2  | 3.2%  | 57                                                        | 2  | 3.5%  | 5                                                         | 0 | 0.0%  |
| Control      | 75                                             | 3  | 4.0%  | 59                                                        | 3  | 5.1%  | 16                                                        | 0 | 0.0%  |
| <b>Total</b> | 396                                            | 35 | 8.8%  | 353                                                       | 33 | 9.3%  | 43                                                        | 2 | 4.7%  |

CIN2 = cervical intraepithelial neoplasia grade 2; CIN3 = CIN grade 3, AIS = adenocarcinoma in situ; HS = hotspot.
