# Supplementary material for: Somatic mutations in 3929 HPV positive cervical cells associated with infection outcome and HPV type
Source: PubMed Central journal article supplement (PMC11393421; doi:10.1038/s41467-024-51713-y), 2024-09-12
Supplement: 41467_2024_51713_MOESM3_ESM.pdf [file 41467_2024_51713_MOESM3_ESM.pdf]

## Description of Additional Supplementary Files

### **File Name: Supplementary Data 1**

**Description:** Individual sample coverage metrics across the 20 genes targeted by our panel for all 3,929 single time-point and serial samples.

### **File Name: Supplementary Data 2**

**Description:** List of the 3,192 mutated sites evaluated and their TIER classification.

**Legend:** REF = reference allele; ALT = alternative allele; c.DNA = DNA sequence change; Alteration = amino acid change for the nonsynonymous mutations.
